# Supplementary material for: Effect of TRPV4 Antagonist GSK2798745 on Chlorine Gas-Induced Acute Lung Injury in a Swine Model
Source: MDPI journal article supplement (doi:10.3390/ijms25073949), 2024-04-02
Supplement: s1 [file s1]

## **Supplemental Materials**

### **Supplemental Tables**

**Table S1.** Model Development Study Animal Demographics and Exposure/Treatment Assignments

**Table S2.** Dose Response Study Animal Demographics and Exposure/Treatment Assignments

### **Supplemental Figures**

**Figure S1.** Chlorine Exposure System Schematic

**Figure S2.** Kinetics of Functional Lung Injury during Chlorine Exposure

**Figure S3.** Kinetics of Functional Lung Injury following Chlorine Exposure

**Figure S4.** GSK2798745 Plasma Concentration vs. Time Profiles

**Figure S5.** Functional Lung Measurements Unaffected by GSK2798745 Treatment

**Table S1.** Model Development Study Animal Demographics and Exposure/Treatment Assignments

| Animal ID | Sex    | Approx. Age at Study Start (weeks) | Body Weight (kg) | Exposure Duration (min) | Targeted Cl <sub>2</sub> Dose (mg/kg) | Actual Cl <sub>2</sub> Dose (mg/kg) | GSK'745 Dose Group | Survival (hours) |
|-----------|--------|------------------------------------|------------------|-------------------------|---------------------------------------|-------------------------------------|--------------------|------------------|
| 7465      | Female | 13.0                               | 30.2             | 60                      | 0                                     | 0                                   | N/A                | 24               |
| 7440      | Male   | 12.7                               | 30.4             | 60                      | 0                                     | 0                                   | N/A                | 24               |
| 7443      | Male   | 18.4                               | 37.3             | 19                      | 2.60                                  | 2.09                                | N/A                | 24               |
| 8372      | Female | 14.4                               | 29.0             | 30                      | 4.10                                  | 3.00                                | N/A                | 24               |
| 8375      | Male   | 15.7                               | 28.2             | 40                      | 5.47                                  | 4.04                                | N/A                | 24               |
| 8996      | Male   | 11.3                               | 31.6             | 45                      | 6.16                                  | 4.36                                | N/A                | 24               |
| 8998      | Female | 11.3                               | 30.4             | 45                      | 6.16                                  | 4.79                                | N/A                | 24               |
| 8371      | Female | 16.7                               | 33.6             | 50                      | 6.84                                  | 5.20                                | N/A                | 24               |
| 8992      | Male   | 14.9                               | 28.8             | 50                      | 6.84                                  | 5.83                                | N/A                | 24               |
| 8972      | Female | 13.1                               | 30.2             | 50                      | 6.84                                  | 4.77                                | N/A                | 24               |
| 8993      | Male   | 17.0                               | 34.4             | 55                      | 7.52                                  | 6.27                                | N/A                | 24               |
| 8999      | Female | 15.4                               | 33.2             | 55                      | 7.52                                  | 5.91                                | N/A                | 24               |
| 1224      | Male   | 13.3                               | 26.2             | 55                      | 7.52                                  | 6.08                                | N/A                | 24               |
| 1221      | Female | 14.4                               | 25.8             | 55                      | 7.52                                  | 5.67                                | N/A                | 24               |
| 1745      | Male   | 11.4                               | 29.6             | 55                      | 7.52                                  | 5.15                                | N/A                | 24               |
| 1746      | Female | 11.5                               | 25.6             | 55                      | 7.52                                  | 4.82                                | N/A                | 24               |
| 8374      | Male   | 13.0                               | 28.2             | 60                      | 8.21                                  | 5.27                                | N/A                | <1               |
| 9917      | Female | 12.6                               | 29.0             | 65                      | 8.89                                  | 6.83                                | N/A                | 24               |
| 9914      | Male   | 12.4                               | 29.4             | 65                      | 8.89                                  | 7.12                                | N/A                | 24               |
| 9918      | Female | 14.0                               | 30.4             | 75                      | 10.26                                 | 7.64                                | N/A                | 24               |
| 9913      | Male   | 14.3                               | 29.2             | 75                      | 10.26                                 | 8.33                                | N/A                | 24               |
| 1219      | Female | 11.6                               | 27.0             | 88                      | 12.04                                 | 8.83                                | N/A                | 0                |
| 7458      | Female | 16.4                               | 33.8             | 89                      | 12.18                                 | 11.10                               | N/A                | <1               |
| 1222      | Male   | 11.6                               | 28.2             | 90                      | 12.31                                 | 9.81                                | N/A                | 24               |

**Table S2.** Dose Response Study Animal Demographics and Exposure/Treatment Assignments

| Animal ID | Sex    | Approx. Age at Study Start (weeks) | Body Weight (kg) | Exposure Duration (min) | Targeted Cl <sub>2</sub> Dose (mg/kg) | Actual Cl <sub>2</sub> Dose (mg/kg) | GSK'745 Dose (mg/kg) | Survival (hours) |
|-----------|--------|------------------------------------|------------------|-------------------------|---------------------------------------|-------------------------------------|----------------------|------------------|
| 2050      | Female | 28                                 | 40.7             | 55                      | 0                                     | 0                                   | 0                    | 24               |
| 2064      | Female | 31                                 | 51.7             | 55                      | 7.52                                  | 5.84                                | 0                    | 24               |
| 2069      | Male   | 29                                 | 38.2             | 55                      | 7.52                                  | 5.63                                | 0                    | 24               |
| 2051      | Female | 29                                 | 44.4             | 55                      | 7.52                                  | 5.52                                | 0                    | 24               |
| 2076      | Male   | 30                                 | 50.5             | 55                      | 0                                     | 0                                   | 0                    | 24               |
| 2044      | Female | 31                                 | 44.7             | 55                      | 0                                     | 0                                   | 0                    | 24               |
| 2077      | Male   | 31                                 | 39.4             | 55                      | 7.52                                  | 4.91                                | 0                    | 24               |
| 2066      | Female | 35                                 | 55.4             | 55                      | 7.52                                  | 5.99                                | 0.0714               | 24               |
| 2079      | Male   | 35                                 | 47.5             | 55                      | 7.52                                  | 5.95                                | 0.0006               | 24               |
| 2056      | Female | 36                                 | 47.3             | 55                      | 7.52                                  | 6.11                                | 5.94                 | 24               |
| 2091      | Male   | 35                                 | 47.7             | 55                      | 7.52                                  | 5.93                                | 0.0072               | 24               |
| 2052      | Female | 35                                 | 54.2             | 55                      | 7.52                                  | 4.57                                | 0.792                | 24               |
| 3408      | Male   | 13                                 | 36.1             | 55                      | 7.52                                  | 4.77                                | 5.94                 | 24               |
| 3398      | Female | 13                                 | 38.3             | 55                      | 0                                     | 0                                   | 0                    | 24               |
| 3404      | Male   | 13                                 | 37.7             | 55                      | 7.52                                  | 4.70                                | 0.0072               | 24               |
| 3411      | Male   | 15                                 | 35.1             | 55                      | 0                                     | 0                                   | 0                    | 24               |
| 3395      | Female | 15                                 | 35.2             | 55                      | 7.52                                  | 4.67                                | 0.0006               | 24               |
| 3400      | Female | 15                                 | 35.0             | 55                      | 7.52                                  | 4.97                                | 0.0714               | 24               |
| 3071      | Male   | 15                                 | 37.0             | 55                      | 7.52                                  | 4.57                                | 5.94                 | 24               |
| 3409      | Male   | 16                                 | 36.0             | 55                      | 7.52                                  | 4.66                                | 0.792                | 24               |
| 3394      | Female | 16                                 | 38.2             | 55                      | 7.52                                  | 4.69                                | 5.94                 | 24               |
| 3396      | Female | 16                                 | 34.5             | 55                      | 7.52                                  | 4.95                                | 0                    | 24               |
| 3412      | Male   | 16                                 | 29.7             | 55                      | 7.52                                  | 4.90                                | 0.0006               | 24               |
| 3401      | Female | 17                                 | 39.2             | 55                      | 7.52                                  | 4.75                                | 0                    | 24               |
| 3406      | Male   | 17                                 | 39.3             | 55                      | 7.52                                  | 4.88                                | 0.0714               | 24               |
| 3066      | Male   | 17                                 | 36.1             | 55                      | 7.52                                  | 4.94                                | 0                    | 24               |
| 3393      | Female | 17                                 | 40.7             | 55                      | 7.52                                  | 4.84                                | 5.94                 | 24               |
| 3405      | Male   | 18                                 | 44.0             | 55                      | 7.52                                  | 4.69                                | 0.0072               | 24               |
| 3060      | Female | 18                                 | 49.0             | 55                      | 7.52                                  | 4.62                                | 5.94                 | 24               |
| 3403      | Male   | 18                                 | 40.0             | 55                      | 7.52                                  | 4.60                                | 0                    | 24               |
| 3397      | Female | 18                                 | 38.5             | 55                      | 7.52                                  | 4.55                                | 0.792                | 24               |
| 4156      | Male   | 20                                 | 32.0             | 55                      | 7.52                                  | 5.12                                | 0.0714               | 24               |
| 4200      | Female | 12                                 | 35.4             | 55                      | 7.52                                  | 4.87                                | 5.94                 | 24               |
| 4196      | Female | 12                                 | 35.5             | 55                      | 7.52                                  | 4.98                                | 0.792                | 24               |
| 4158      | Male   | 11                                 | 31.3             | 55                      | 7.52                                  | 5.09                                | 0                    | 24               |
| 4198      | Female | 13                                 | 31.2             | 55                      | 7.52                                  | 4.77                                | 0                    | 24               |
| 4159      | Male   | 12                                 | 29.5             | 55                      | 7.52                                  | 4.89                                | 0.0006               | 24               |
| 4160      | Male   | 12                                 | 33.3             | 55                      | 7.52                                  | 5.33                                | 0.0072               | 24               |
| 4186      | Female | 12                                 | 34.4             | 55                      | 7.52                                  | 4.83                                | 5.94                 | 24               |
| 4165      | Male   | 13                                 | 31.6             | 55                      | 7.52                                  | 5.15                                | 5.94                 | 24               |
| 4192      | Female | 14                                 | 36.1             | 55                      | 7.52                                  | 4.68                                | 0.0714               | 24               |
| 4182      | Female | 13                                 | 40.0             | 55                      | 7.52                                  | 4.59                                | 0                    | 24               |
| 4188      | Male   | 14                                 | 41.5             | 55                      | 7.52                                  | 4.93                                | 0.792                | 24               |
| 4195      | Female | 16                                 | 53.0             | 55                      | 7.52                                  | 4.63                                | 0.0072               | 24               |
| 4161      | Male   | 15                                 | 49.5             | 55                      | 0                                     | 0                                   | 0                    | 24               |
| 4166      | Male   | 15                                 | 34.2             | 55                      | 7.52                                  | 5.10                                | 5.94                 | 24               |
| 4187      | Female | 15                                 | 33.0             | 55                      | 7.52                                  | 5.15                                | 0.0006               | 24               |
| 4189      | Male   | 16                                 | 33.2             | 55                      | 7.52                                  | 5.16                                | 0                    | 24               |
| 4184      | Female | 16                                 | 32.1             | 55                      | 7.52                                  | 5.19                                | 0.792                | 24               |
| 4190      | Female | 17                                 | 32.8             | 55                      | 7.52                                  | 5.00                                | 0.0714               | 24               |

|      |        |    |      |    |      |      |        |    |
|------|--------|----|------|----|------|------|--------|----|
| 4614 | Female | 13 | 31.8 | 55 | 7.52 | 5.08 | 5.94   | 24 |
| 4630 | Male   | 14 | 28.2 | 55 | 7.52 | 5.05 | 0.0072 | 24 |
| 4633 | Male   | 14 | 28.9 | 55 | 7.52 | 5.06 | 0.0006 | 24 |
| 4619 | Female | 14 | 31.8 | 55 | 7.52 | 5.28 | 0      | 24 |
| 4620 | Female | 17 | 32.2 | 55 | 7.52 | 4.89 | 0      | 24 |
| 4634 | Male   | 17 | 35.4 | 55 | 7.52 | 4.95 | 5.94   | 24 |
| 4635 | Male   | 17 | 36.2 | 55 | 7.52 | 4.97 | 0      | 24 |
| 4617 | Female | 17 | 36.5 | 55 | 7.52 | 5.08 | 0.0072 | 24 |
| 4631 | Male   | 18 | 34.4 | 55 | 7.52 | 4.98 | 0.792  | 24 |
| 4615 | Female | 17 | 37.1 | 55 | 7.52 | 4.78 | 0      | 24 |
| 4632 | Male   | 18 | 37.8 | 55 | 7.52 | 5.03 | 0.0714 | 24 |
| 4616 | Female | 18 | 36.2 | 55 | 7.52 | 5.06 | 5.94   | 24 |

## Supplemental Figures

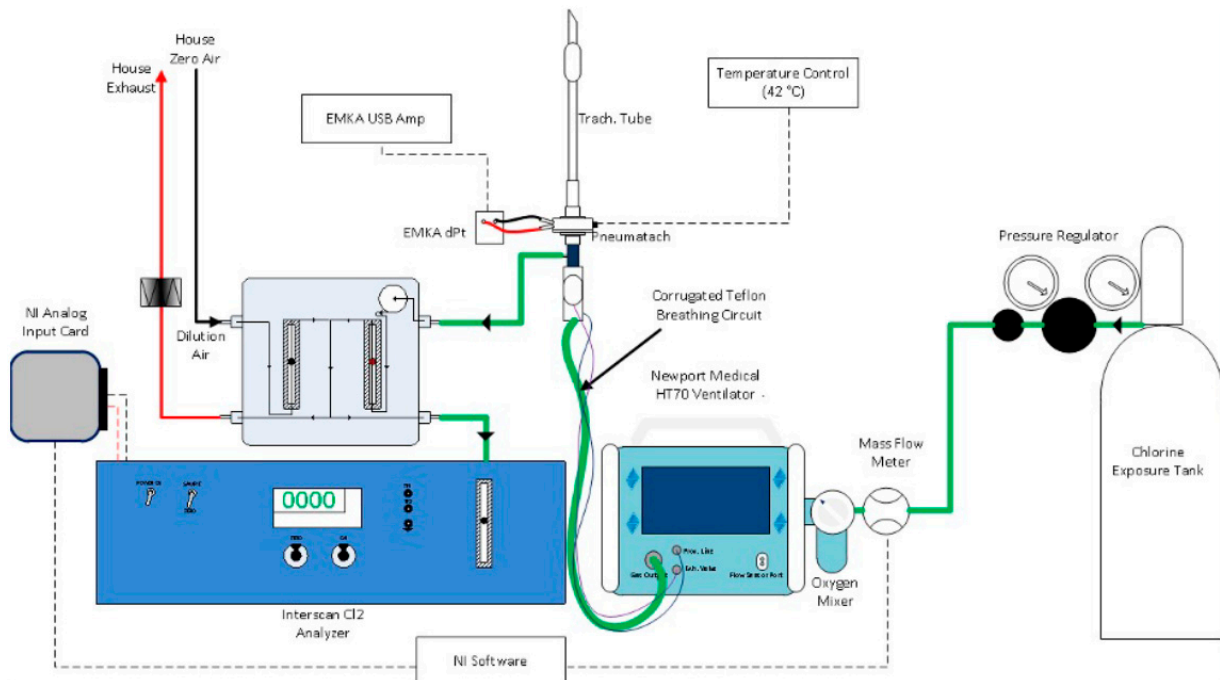

**Figure S1. Chlorine exposure system schematic.** Yorkshire swine were exposed to 240 ppm chlorine gas by intratracheal inhalation using volume-controlled mechanical ventilation. Chlorine gas (240 ppm balanced in medical air) was connected to a Newport HT-70 ventilator, and swine were mechanically ventilated at 12 mL/kg and 20 breaths per minute through a Teflon-lined breathing circuit. Pulmonary function and tidal volume were continuously measured throughout exposure using a pneumotachometer and pressure transducer connected to the end of the endotracheal tube.

**a** Lung Resistance

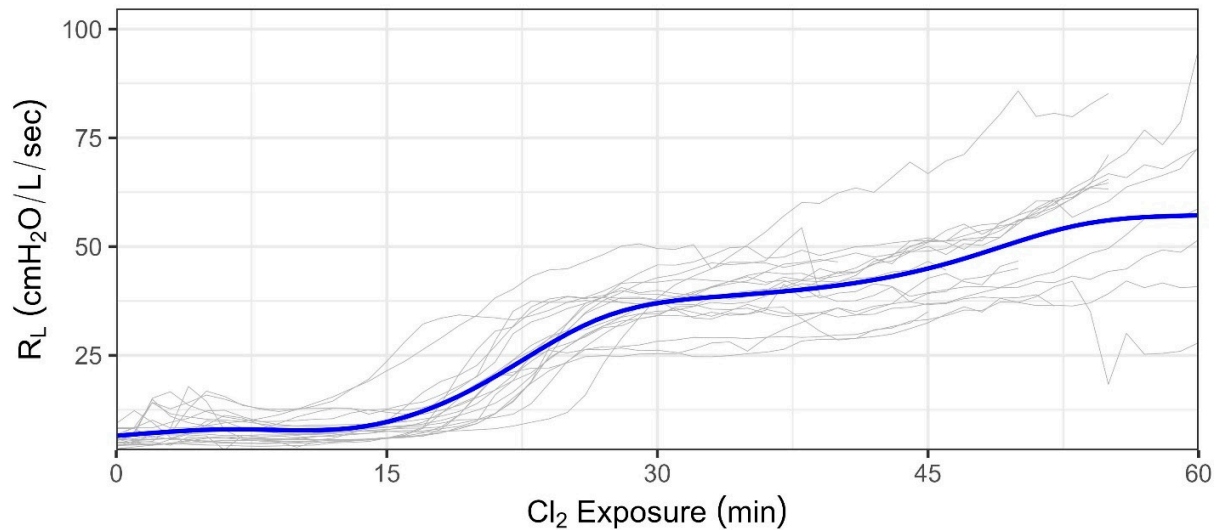

**b** Dynamic Compliance

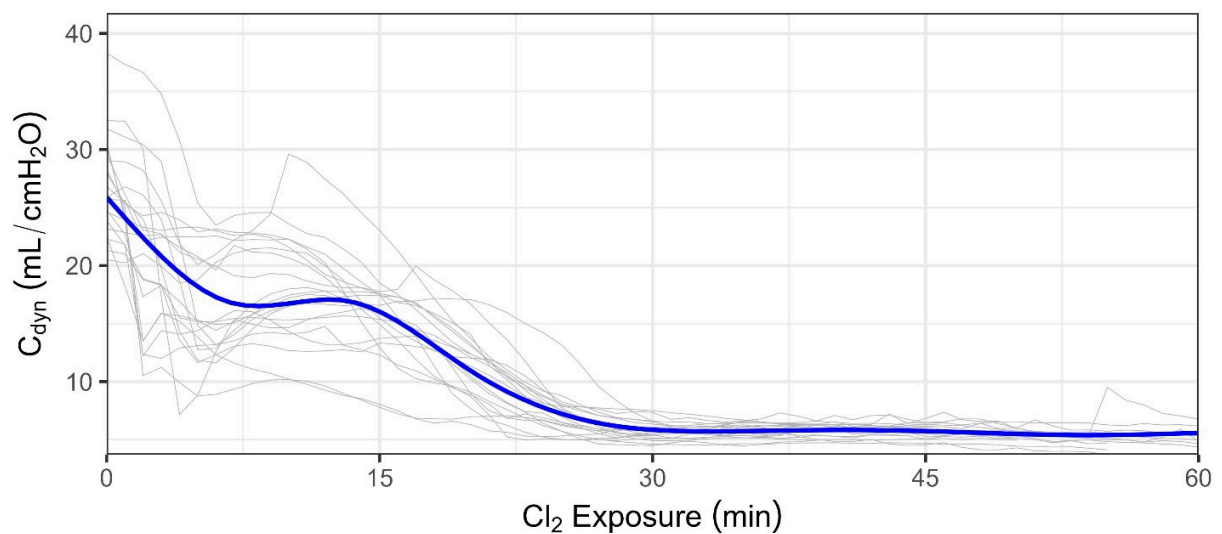

**Figure S2. Kinetics of functional lung injury during chlorine exposure.** Swine were exposed to 240 ppm chlorine gas ( $\text{Cl}_2$ ,  $n=21$ ) for between 19 and 90 minutes. Lung resistance ( $R_L$ ) (**a**) and dynamic compliance ( $C_{\text{dyn}}$ ) (**b**) were measured in real time during exposure from phase-matched flow and pressure signals that were integrated using EMKA iox software, and 60-second averages were calculated for each animal through the first 60 minutes of exposure. A smooth curve fit (using generalized additive models; in blue), representing the mean trajectory across all animals was traced through the individual animal trajectories for both resistance and compliance.

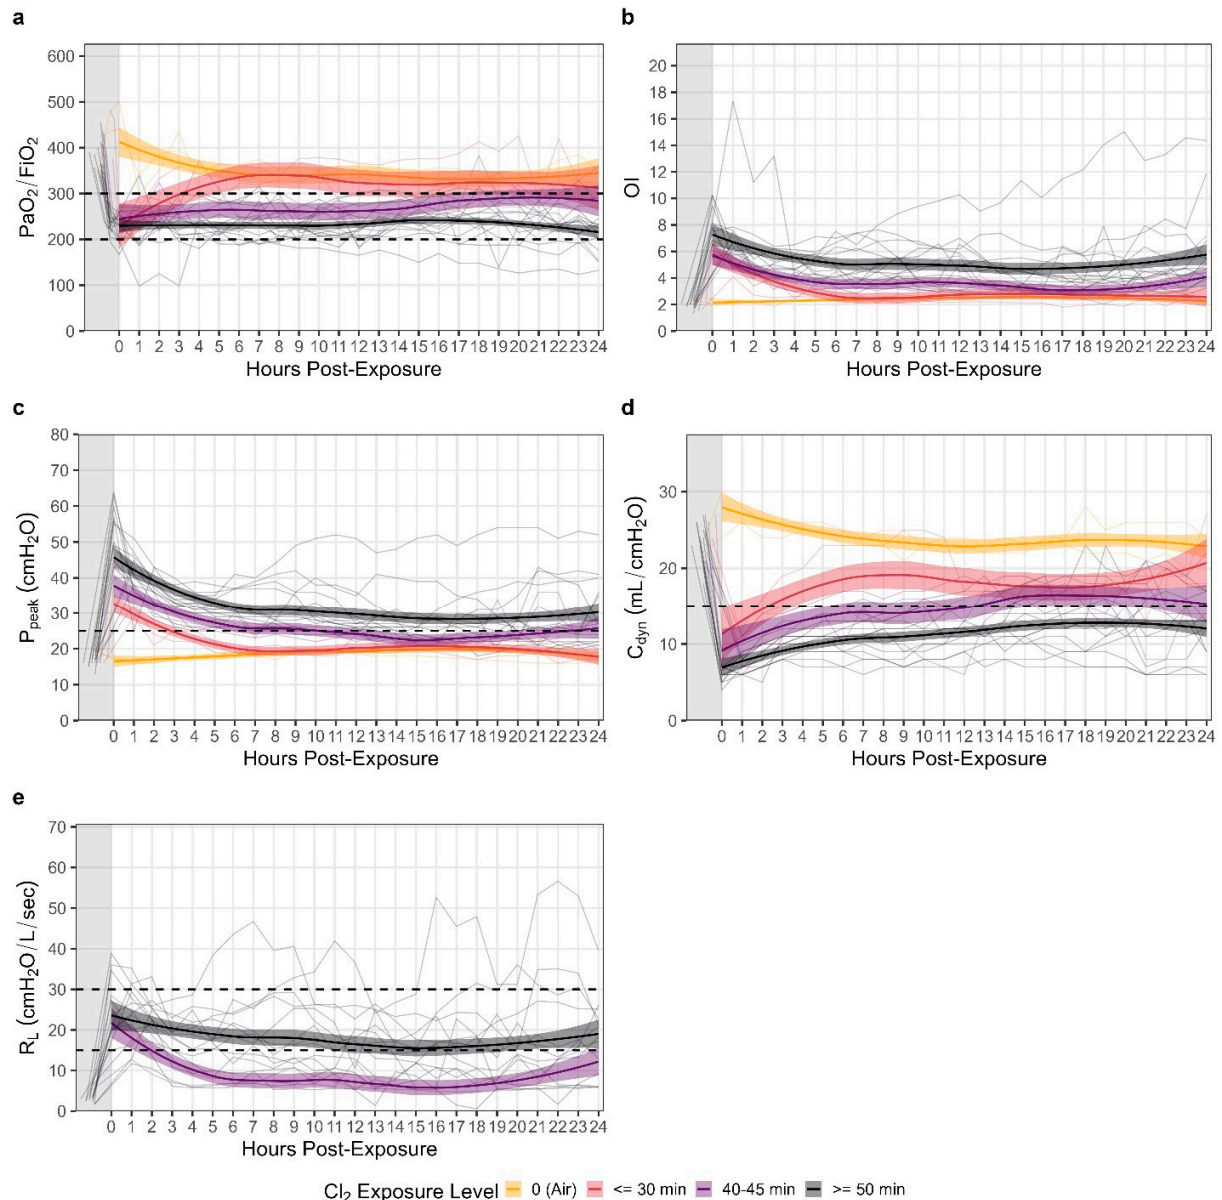

**Figure S3. Kinetics of functional lung injury following chlorine exposure.** Swine were exposed to 240 ppm chlorine gas ( $Cl_2$ ,  $n=19$ ) or room air ( $n=2$ ; circles) via controlled ventilation for between 19 and 90 minutes.  $PaO_2/FiO_2$  (P/F) ratio was calculated assuming a 21%  $FiO_2$ . The  $PaO_2/FiO_2$  (P/F) ratio (a), oxygenation index (OI; b), peak airway pressure ( $P_{peak}$ ; c), dynamic compliance ( $C_{dyn}$ ; d), and lung resistance ( $R_L$ ; e) were recorded once at baseline (i.e., prior to exposure) and once hourly following the end of exposure for 24 hours ( $R_L$  only available in those animals exposed to  $Cl_2$  for 40 minutes or greater). Dashed lines represent target thresholds for the desired acute lung injury phenotype (i.e., 200-300 for P/F ratio, 25  $cmH_2O$  or above for  $P_{peak}$ , 15  $mL/cmH_2O$  or below for  $C_{dyn}$ , 15-30  $cmH_2O/L/sec$  for  $R_L$ ). Curve fits (and 95% confidence ribbons; obtained via generalized additive models and starting post-exposure) are presented for air controls (in yellow), chlorine exposures of less than 30 minutes (in red), chlorine exposures between 40 and 45 minutes (in purple), and exposures 50 minutes and above (in black).

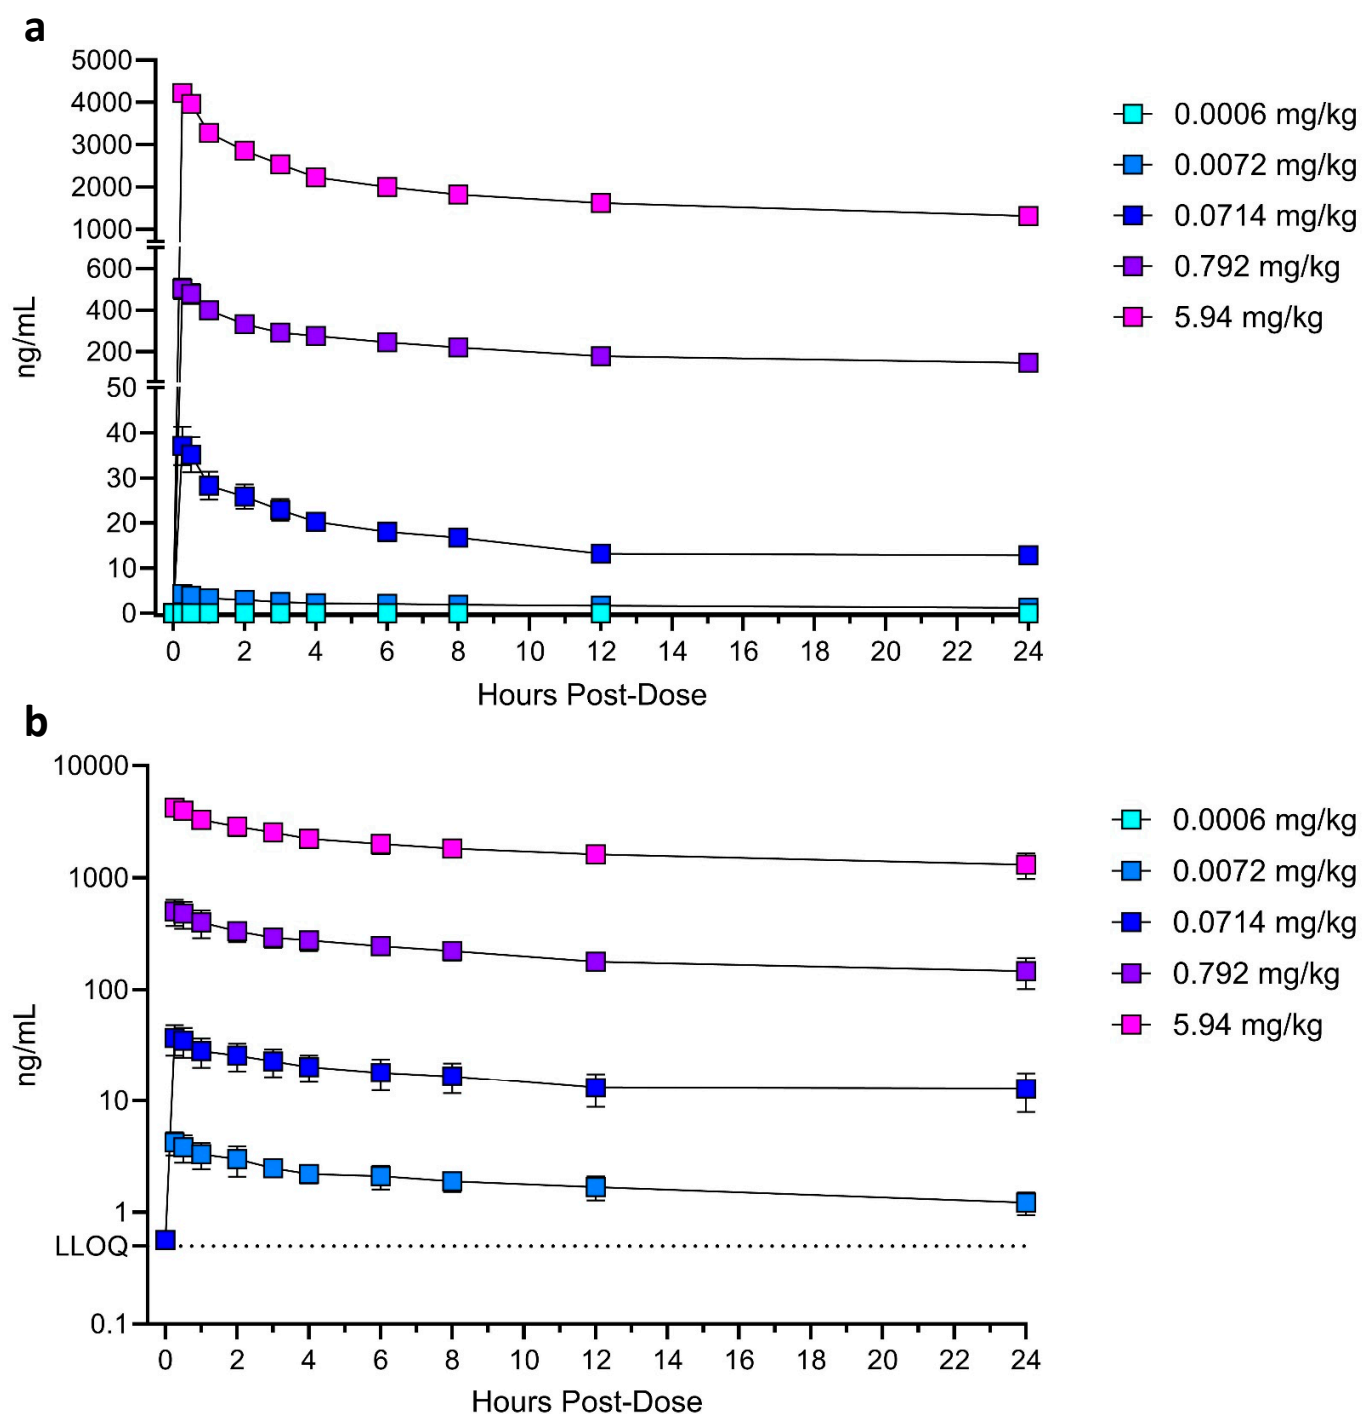

**Figure S4. GSK2798745 plasma concentration vs. time profiles.** Yorkshire swine were exposed to 240 ppm chlorine gas for 55 minutes. Following exposure, animals were treated with GSK2798745 by intravenous infusion (n=6-16 per treatment group). Plasma GSK2798745



concentrations, represented on (a) linear and (b) logarithmic scales, were measured by LC-MS/MS at 0.25, 0.5, 1, 2, 3, 4, 6, 8, 12 and 24 hours following the end of dosing. The mean  $\pm$  standard deviation for each experimental group are shown. Values below the assay lower limit of quantification (LLOQ) were plotted at the LLOQ (i.e., 0.5 ng/mL).

**a** Peak Airway Pressure

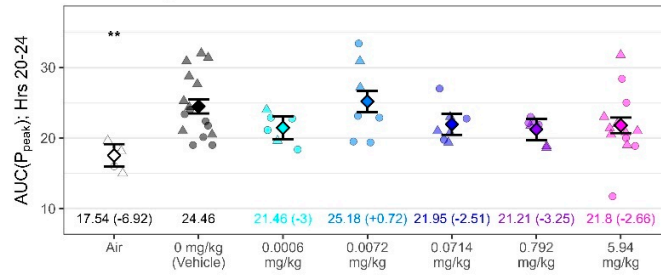

**b** Mean Airway Pressure

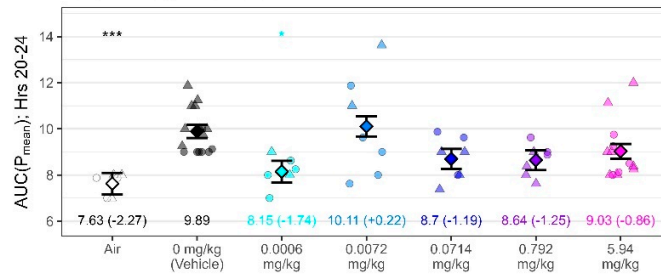

**c** Plateau Airway Pressure

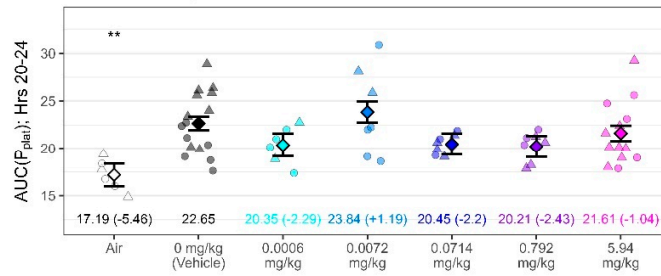

**d** Dynamic Compliance (C<sub>dyn</sub>)

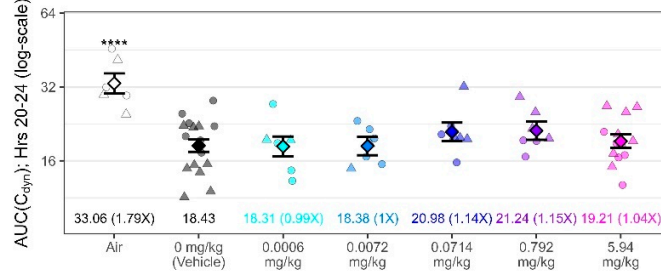

**e** Lung Resistance (R<sub>L</sub>)

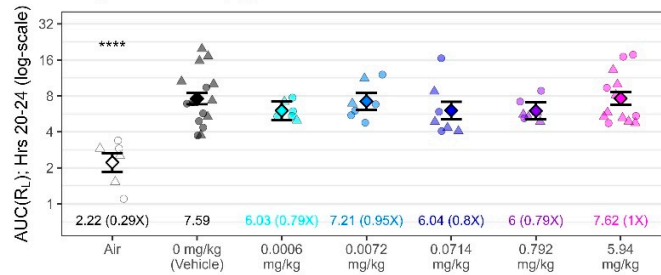

○ Male △ Female

**Figure S5. Functional lung measurements unaffected by GSK2798745 treatment.** Yorkshire swine were exposed to either 240 ppm chlorine gas or room air by intratracheal inhalation for 55 minutes. Following exposure, animals were treated with either vehicle or GSK2798745 by intravenous infusion (n=6-16 per treatment group). Peak ( $P_{\text{peak}}$ , **a**), mean ( $P_{\text{mean}}$ , **b**) and plateau ( $P_{\text{plat}}$ , **c**) pulmonary pressure, as well as dynamic compliance ( $C_{\text{dyn}}$ , **d**) and lung resistance ( $R_L$ , **e**) was measured hourly post-exposure for 24 hours, and the area under the curve (AUC) for measurements from 20-24 hours post-exposure are presented. Individual data points (jittered horizontally to remove overlap), overlayed with model estimates (diamonds) and standard errors are displayed for each experimental group, with the levels and difference compared to vehicle control listed underneath. Between-treatment comparisons to Vehicle: \*\* =  $p < 0.01$ , \*\*\* =  $p < 0.001$ , \*\*\*\* =  $p < 0.0001$ .
